# Supplementary material for: Phenotypic and functional analysis of SHANK3 stop mutations identified in individuals with ASD and/or ID
Source: Springer Nature journal article supplement (doi:10.1186/s13229-015-0020-5), 2015-04-28
Supplement: MOESM1 [file 9785374]

**Additional file 1: Table S1. Descriptive and diagnostic data by patient: Mullen Scales of Early Learning, Nonverbal IQ estimate, Vineland Adaptive Behavior Scales, ADI-R, and ADOS-2.**

| Participant   | Age (yrs: mo) | Mullen Scales of Early Learning |                  |            |                 |                  |       | Vineland Adaptive Behavior Scales-II (Standard Score) |               |               |              |       | ADI-R <sup>&amp;</sup> |         |          | ADOS-2 Module 1 |           |                         |                |        | Diagnosis |
|---------------|---------------|---------------------------------|------------------|------------|-----------------|------------------|-------|-------------------------------------------------------|---------------|---------------|--------------|-------|------------------------|---------|----------|-----------------|-----------|-------------------------|----------------|--------|-----------|
|               |               | Gross Motor                     | Visual Reception | Fine Motor | Receptive Lang. | Expressive Lang. | NVIQ  | A B C                                                 | Communication | Socialization | Daily Living | Motor | A: Social              | B: Comm | C: RRBIs | SA Total        | RRB Total | Overall (SA+ RRB) Total | Severity Score | DSM-IV | Consensus |
| P1 (G1527A)   | 5:1           | n/a                             | 12               | 15         | 8               | 6                | 19.67 | 45                                                    | 42            | 49            | 38           | 59    | 23                     | 13      | 6        | 19              | 5         | 24                      | 8              | 2      | 2         |
| P2 (2497delG) | 7:1           | 20                              | 14               | 18         | 13              | 5                | 16.51 | 49                                                    | 45            | 51            | 52           | 40    | 17                     | 10      | 7        | 2               | 3         | 5                       | 2              | 0      | 0         |
| P3 (A5008T)   | 12:2          | 30                              | 20               | 20         | 8               | 9                | 13.63 | 44                                                    | 42            | 42            | 50           | 64    | 29                     | 13      | 4        | 18              | 2         | 20                      | 7              | 2      | 2         |

<sup>&</sup>ADI-R cutoff scores for autism are: Social = 10, Communication (nonverbal) = 7, Repetitive behaviors and restricted interests = 3

<sup>&</sup>ADOS-2 Module 1 cutoff scores on Overall Total Score for autism and ASD are 16 and 11, respectively.

Abbreviations: ABC= Adaptive Behavior Composite (Vineland); ADI-R=Autism Diagnostic Interview-Revised; A: Social= Qualitative Abnormalities in Reciprocal Social Interaction; B: Comm= Qualitative Abnormalities in Communication; C: RRBIs= Restricted, Repetitive, and Stereotyped Patterns of Behavior; ADOS= Autism Diagnostic Observation Schedule; SA Total= Social Affect Total; RRB Total=Restricted and Repetitive Behavior Total; Consensus=Consensus diagnosis; DSM-IV= Diagnostic and Statistical Manual of Mental Disorders-IV; IQ= intellectual quotient; NVIQ= Nonverbal IQ; n/a= not available; yrs=years.
