# Supplementary material for: Phenotypic and functional analysis of SHANK3 stop mutations identified in individuals with ASD and/or ID
Source: Springer Nature journal article supplement (doi:10.1186/s13229-015-0020-5), 2015-04-28
Supplement: MOESM2 [file 9785374]

**Additional file 2: Table S2**

**Medical Features**

| Participant | Mutation | Seizures | Hypotonia | Recurring infection | Constipation/<br>diarrhea | Gastroesophageal reflux<br>disease | History or regression | Gait abnormalities | Brain MRI abnormalities | Sleep disturbance |
|-------------|----------|----------|-----------|---------------------|---------------------------|------------------------------------|-----------------------|--------------------|-------------------------|-------------------|
| 1           | G1527A   |          | x         |                     |                           |                                    |                       | x                  | x                       |                   |
| 2           | 2497delG | x        | x         | x                   | x                         | x                                  | x                     | x                  | x                       | x                 |
| 3           | A5008T   | x        | x         | x                   | x                         | x                                  | x                     | x                  | x                       | x                 |

**Dysmorphic features**

| Participant | Mutation | Long eyelashes | Ear anomalies | Full lips | Epicanthal folds | Macrocephaly | Dolicocephaly | Wide nasal bridge | Hypertelorism | Short stature | 2-3 Syndactyly of toes | 5th Finger clinodactyly | Deep set eyes | Broad nasal bridge |
|-------------|----------|----------------|---------------|-----------|------------------|--------------|---------------|-------------------|---------------|---------------|------------------------|-------------------------|---------------|--------------------|
| 1           | G1527A   | x              | x             | x         | x                | x            |               | x                 | x             |               |                        |                         |               | x                  |
| 2           | 2497delG |                |               |           |                  |              | x             |                   |               | x             |                        |                         |               |                    |
| 3           | A5008T   |                |               |           |                  |              |               |                   |               |               | x                      | x                       | x             |                    |
